# Supplementary material for: Fabrication of ultrathin CuO nanowires augmenting oriented attachment crystal growth directed self-assembly of Cu(OH)2 colloidal nanocrystals
Source: Nanoscale Adv. 2020 May 18;2(7):2897–906. doi: 10.1039/d0na00308e (PMC9419473; doi:10.1039/d0na00308e)
Supplement: NA-002-D0NA00308E-s001 [file NA-002-D0NA00308E-s001.pdf]

## Supporting Information

# Fabrication of Ultrathin CuO Nanowires Augmenting Oriented Attachment Crystal Growth Directed Self-Assembly of Cu(OH)<sub>2</sub> Colloidal Nanocrystals

Gayani Pathiraja,<sup>a</sup> Ryan Yarbrough,<sup>a</sup> and Hemali Rathnayake<sup>\*a</sup>

<sup>\*a</sup>Department of Nanoscience, Joint School of Nanoscience and Nanoengineering,  
University of North Carolina at Greensboro, Greensboro NC 27401

**Table S1:** The dimension analysis of Cu(OH)<sub>2</sub> nanowires at different stirring time intervals.

| Stirring time | Average Length (nm)± SD | Average Diameter (nm) ± SD |
|---------------|-------------------------|----------------------------|
| 5 min         | 201.9±13.0              | 2.4± 0.4                   |
| 10 min        | 222.2±17.1              | 2.4± 0.4                   |
| 15 min        | 285.4±28.9              | 5.2± 1.2                   |
| 30 min        | 352.1±26.7              | 5.5± 1.2                   |
| 45 min        | 440.6±24.5              | 5.1± 0.7                   |
| 1 h           | 457.3±27.0              | 5.0± 0.9                   |
| 2 h           | 480.9±31.4              | 5.0± 1.0                   |
| 3 h           | 499.6±25.5              | 5.9± 0.9                   |
| 4 h           | 518.2±24.7              | 5.0± 1.1                   |
| 5 h           | 550.7±22.6              | 5.0± 1.0                   |
| 6 h           | 545.6±16.8              | 5.3± 1.6                   |

*Note: Average lengths of nanowires were calculated by taking nanowires with maximum lengths and nanowires with minimum lengths, thus SD represents the deviation of nanowires lengths.*

**Table S2:** Length and diameter of Cu(OH)<sub>2</sub> NWs with respect to different aging time after 4hrs of stirring.

| Trial # | Aging time [h] | Average Length (nm) ± SD | Average Diameter (nm) ± SD |
|---------|----------------|--------------------------|----------------------------|
| 1       | 6              | 658.7±32.6               | 6.4± 2.1                   |
| 2       | 6              | 659.3±72.9               | 7.2± 2.3                   |
| 3       | 6              | 685.7±48.5               | 7.1± 2.2                   |
| 4       | 24             | 680.0±43.9               | 5.1± 2.0                   |
| 5       | 24             | 676.9±86.4               | 5.5± 1.5                   |
| 6       | 24             | 665.9±66.0               | 5.2± 2.1                   |

*Note: Average lengths of nanowires were calculated by taking nanowires with maximum lengths and nanowires with minimum lengths, thus SD represents the deviation of nanowires lengths.*

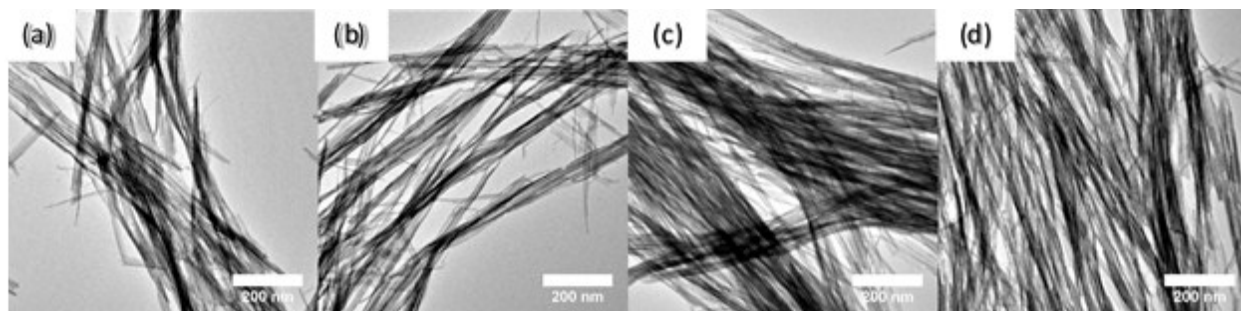

**Figure S1:** TEM images of fully grown  $\text{Cu}(\text{OH})_2$  nanowires at different stirring time intervals followed by different aging time intervals (a) 1 hr stirring followed by 6 hrs aging (b) 1 hr stirring followed by 24 hrs aging (c) 4 hrs stirring followed by 6 hrs aging (d) 4 hrs stirring followed by 24 hrs aging.

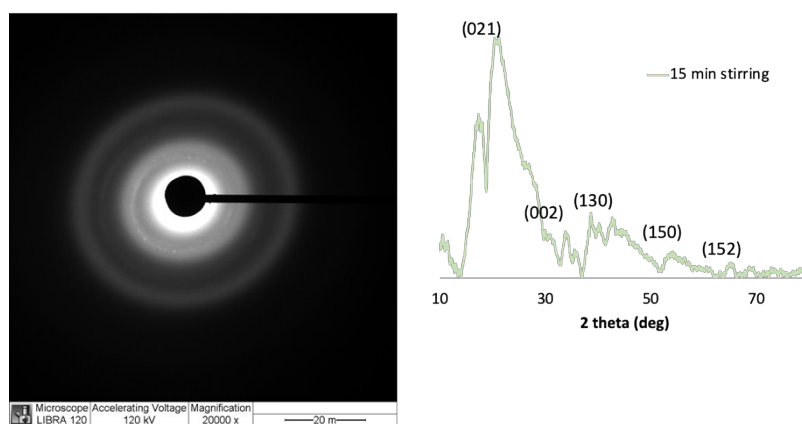

**Figure S2:** Time dependent SAED pattern along with powder XRD traces of  $\text{Cu}(\text{OH})_2$  colloidal nanocrystals at the stirring time of 15 min.

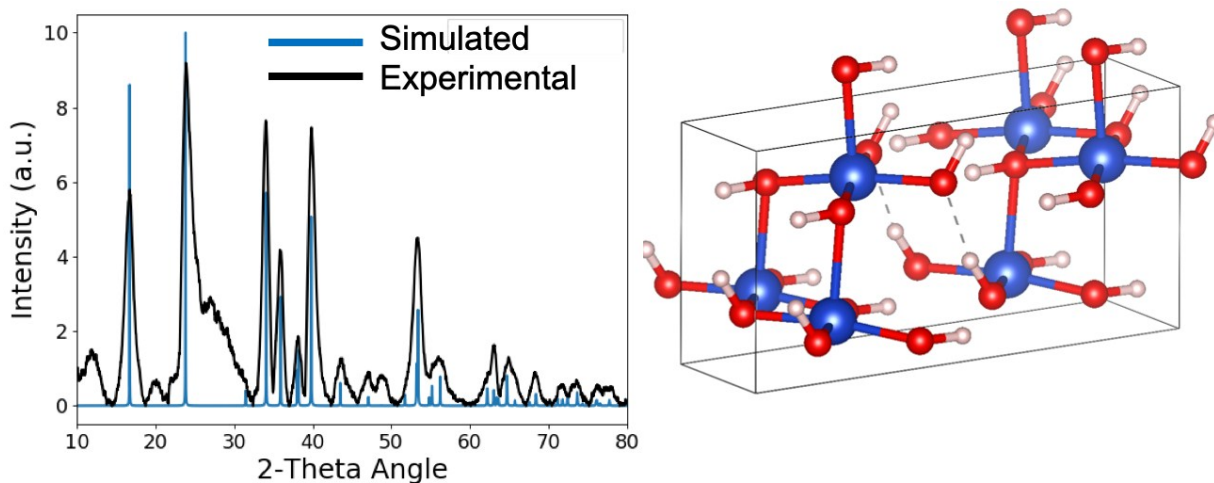

**Figure S3:** The simulated and experimental powder XRD patterns of Cu(OH)<sub>2</sub> nanowires and it's Orthorhombic crystal unit cell obtained from the Crystallographic Open Database (COD #9007849)

**Table S3:** XPS analysis of before annealed and after annealed NWs

| Sample                  | Peak                                        | Position BE (eV)±0.10 eV | FWHM (eV) ±0.20 eV | Atomic Con. (%) |
|-------------------------|---------------------------------------------|--------------------------|--------------------|-----------------|
| Cu(OH) <sub>2</sub> NWs | Cu 2p <sub>1/2</sub> ; Cu 2p <sub>3/2</sub> | 934.9, 955.0             | 6.05               | 31.82           |
|                         | O 1S                                        | 530.5                    | 4.47               | 62.54           |
| CuO NWs                 | Cu 2p <sub>1/2</sub> ; Cu 2p <sub>3/2</sub> | 933.1, 953.0             | 3.02               | 40.5            |
|                         | O 1S                                        | 528.7, 530.5             | 0.94               | 42.96           |

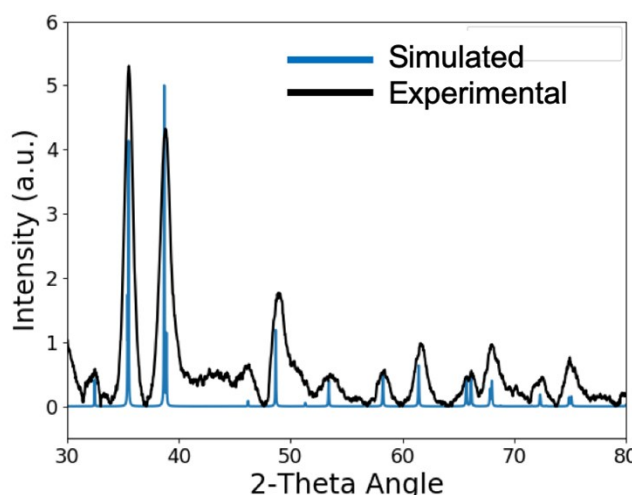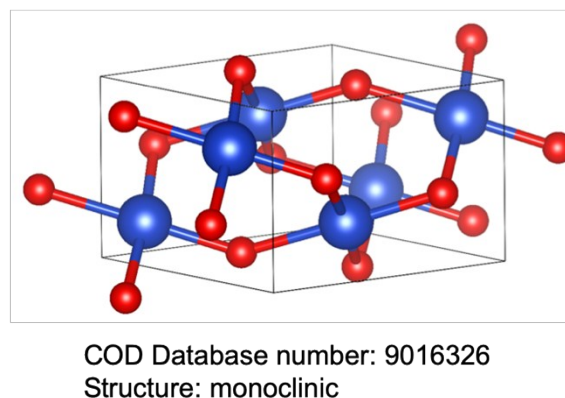

**Figure S4:** The simulated and experimental powder XRD patterns of CuO nanowires and it's Monoclinic crystal unit cell obtained from the Crystallographic Open Database (COD #9016326)

**Table S4:** Length and diameter of CuO NWs produced upon annealing Cu(OH)<sub>2</sub> nanowires, which were made at 4 hours stirring followed by 6 hours and 24 hours aging respectively. The powder samples of Cu(OH)<sub>2</sub> nanowires were annealed at 300 °C, an hour.

| Trial | Aging time [h] | Average Length (μm) ± SD | Average Diameter (nm) ± SD |
|-------|----------------|--------------------------|----------------------------|
| 1     | 6              | 5.6±0.4                  | 27.5± 6.0                  |
| 2     | 6              | 5.5±0.3                  | 31.6± 10.7                 |
| 3     | 6              | 5.4±0.3                  | 24.6± 6.9                  |
| 4     | 24             | 7.7±0.4                  | 29.4± 4.4                  |
| 5     | 24             | 7.1±0.3                  | 24.2± 4.4                  |
| 6     | 24             | 7.5±0.3                  | 26.0± 8.6                  |

*Note: Average lengths of nanowires were calculated by taking nanowires with maximum lengths and nanowires with minimum lengths. SD represents the deviation of nanowires lengths.*
